# Supplementary material for: A New Derivative of Retro-2 Displays Antiviral Activity against Respiratory Syncytial Virus
Source: Preprints.org preprint supplement (doi:10.20944/preprints202310.1733.v1), 2023-10-26
Supplement: Supplementary file 1 [file supplementary]

**Supplemental Materials**

A new derivative of Retro-2 displays antiviral activity against Respiratory Syncytial Virus

Adrien Le Rouzic 1,2, Jenna Fix 1, Robin Vinck 2,3, Sandrine Kappler-Gratias 4, Romain Volmer 5, Franck Gallardo 4, Jean-François Eléouët 1, Mathilde Keck 2, Jean-Christophe Cintrat 3, Julien Barbier 2, Daniel Gillet 2,*, Marie Galloux 1,*

**

**

**Figure S1: Antiviral activity of Retro-2.2 against hRSV infection on** different cell lines. HEp-2, A549, BEAS-2B, and 293T cells were infected for 2 h with mCherry-rRSV at MOI 0.2. The medium was then changed to incubate cells in the absence (DMSO) or the presence of Retro-2.2 at 3 µM for 48 h. The viral replication was quantified by measurement of the mCherry fluorescence. Data are means SEM from two independent experiments made in duplicates. *, *P* < 0.05.
